# Supplementary material for: Sex differences in respiratory and circulatory cost during hypoxic walking: potential impact on oxygen saturation
Source: PubMed Central journal article supplement (PMC6606641; doi:10.1038/s41598-019-44844-6), 2019-07-02
Supplement: 41598_2019_44844_MOESM1_ESM.pdf [file 41598_2019_44844_MOESM1_ESM.pdf]

**TITLE:** Sex differences in respiratory and circulatory cost during hypoxic walking: potential impact on oxygen saturation

Masahiro Horiuchi<sup>1</sup>, Yoko Kirihara<sup>1</sup>, Yoshiyuki Fukuoka<sup>2</sup>, Herman Pontzer<sup>3</sup>

1. Division of Human Environmental Science, Mt. Fuji Research Institute, Kamiyoshida 5597-, Fujiyoshida-city, Yamanashi, 4030005, Japan.

2. Faculty of Health and Sports Science, Doshisha University, Tatara 1-3, Kyotanabe, Kyoto, 6100394, Japan.

3. Department of Evolutionary Anthropology, Duke University, Biological Sciences Building Campus Box 90383 Durham, NC 27708-9976, USA

Corresponding author: Masahiro Horiuchi, Ph.D.

Kamiyoshida 5597-1, Fujiyoshida city, Yamanashi, Japan, 4030005

TEL; +81-555-72-6207, FAX; +81-555-72-6215

E-mail; [mhoriuchi@mfri.pref.yamanashi.jp](mailto:mhoriuchi@mfri.pref.yamanashi.jp)

**Supplemental Table 1.** Energy expenditure (EE), pulmonary ventilation ( $\dot{V}_E$ ), and heart rate (HR) at rest and each gait speed under normoxia and hypoxia in men and women. Changes in these variables ( $\Delta$ ) under moderate hypoxia versus normoxia are shown.

|                                   | Men                                             |                                                  |                   | Women      |             |                   |
|-----------------------------------|-------------------------------------------------|--------------------------------------------------|-------------------|------------|-------------|-------------------|
|                                   | Normoxia                                        | Hypoxia                                          |                   | Normoxia   | Hypoxia     |                   |
| EE, Watts                         |                                                 |                                                  | $\Delta$ EE       |            |             | $\Delta$ EE       |
| Rest                              | 111 ± 14                                        | 114 ± 14                                         | 3                 | 89 ± 15*   | 91 ± 13†    | 2                 |
| 0.67m s <sup>-1</sup>             | 259 ± 34                                        | 264 ± 40                                         | 5                 | 200 ± 27*  | 204 ± 24†   | 4                 |
| 0.83 m s <sup>-1</sup>            | 299 ± 47                                        | 306 ± 50                                         | 7                 | 219 ± 32*  | 224 ± 23†   | 5                 |
| 1.00 m s <sup>-1</sup>            | 332 ± 51                                        | 341 ± 52                                         | 9                 | 244 ± 35*  | 251 ± 24†   | 7                 |
| 1.17 m s <sup>-1</sup>            | 368 ± 63                                        | 377 ± 62                                         | 9                 | 278 ± 37*  | 287 ± 29†   | 9                 |
| 1.33 m s <sup>-1</sup>            | 417 ± 67                                        | 427 ± 65                                         | 10                | 320 ± 41*  | 329 ± 32†   | 9                 |
| 1.50 m s <sup>-1</sup>            | 478 ± 74                                        | 489 ± 67                                         | 11                | 375 ± 56*  | 386 ± 50†   | 11                |
| 1.67 m s <sup>-1</sup>            | 545 ± 74                                        | 559 ± 67                                         | 14                | 443 ± 61*  | 455 ± 55†   | 12                |
| $\dot{V}_E$ , L min <sup>-1</sup> |                                                 |                                                  | $\Delta\dot{V}_E$ |            |             | $\Delta\dot{V}_E$ |
| Rest                              | 11.7 ± 2.9                                      | 13.9 ± 4.3                                       | 2.2               | 9.5 ± 1.5  | 10.4 ± 1.6† | 0.9               |
| 0.67m s <sup>-1</sup>             | 20.1 ± 3.6                                      | 23.3 ± 3.9                                       | 3.2               | 17.0 ± 2.1 | 19.2 ± 2.5  | 2.2               |
| 0.83 m s <sup>-1</sup>            | 22.0 ± 7.4                                      | 26.4 ± 3.8                                       | 4.4               | 18.6 ± 3.1 | 21.7 ± 2.7  | 3.1               |
| 1.00 m s <sup>-1</sup>            | 25.9 ± 6.0                                      | 30.4 ± 4.6                                       | 4.5               | 20.9 ± 3.3 | 24.1 ± 2.5  | 3.2               |
| 1.17 m s <sup>-1</sup>            | 28.0 ± 5.7                                      | 34.6 ± 6.2                                       | 6.6               | 23.5 ± 3.4 | 28.7 ± 3.9  | 5.2               |
| 1.33 m s <sup>-1</sup>            | 32.2 ± 6.1                                      | 39.7 ± 6.3                                       | 7.5               | 26.4 ± 3.8 | 34.2 ± 4.4  | 7.8               |
| 1.50 m s <sup>-1</sup>            | 36.5 ± 6.6                                      | 44.6 ± 7.4                                       | 8.1               | 31.8 ± 4.9 | 40.3 ± 5.9  | 8.5               |
| 1.67 m s <sup>-1</sup>            | 40.7 ± 7.2                                      | 55.8 ± 9.9                                       | 15.1              | 38.1 ± 5.1 | 50.0 ± 6.9  | 11.9              |
| HR, bpm                           |                                                 |                                                  | $\Delta$ HR       |            |             | $\Delta$ HR       |
| Rest                              | 84 ± 8                                          | 94 ± 9                                           | 10                | 82 ± 10    | 91 ± 10     | 9                 |
| 0.67m s <sup>-1</sup>             | 89 ± 7                                          | 107 ± 10                                         | 18                | 93 ± 10    | 111 ± 11    | 18                |
| 0.83 m s <sup>-1</sup>            | 94 ± 7                                          | 115 ± 12                                         | 21                | 99 ± 12    | 119 ± 14    | 20                |
| 1.00 m s <sup>-1</sup>            | 99 ± 6                                          | 122 ± 14                                         | 23                | 103 ± 13   | 128 ± 12    | 25                |
| 1.17 m s <sup>-1</sup>            | 106 ± 6                                         | 130 ± 16                                         | 24                | 111 ± 13   | 137 ± 11    | 26                |
| 1.33 m s <sup>-1</sup>            | 113 ± 7                                         | 138 ± 15                                         | 25                | 118 ± 15   | 147 ± 9     | 29                |
| 1.50 m s <sup>-1</sup>            | 122 ± 8                                         | 147 ± 16                                         | 25                | 130 ± 17   | 157 ± 7     | 27                |
| 1.67 m s <sup>-1</sup>            | 133 ± 13                                        | 160 ± 15                                         | 27                | 142 ± 17   | 168 ± 6     | 26                |
| <b>Results of a two-way ANOVA</b> |                                                 |                                                  |                   |            |             |                   |
|                                   | <b>Normoxia</b>                                 | <b>Hypoxia</b>                                   |                   |            |             |                   |
| EE                                | Sex: F (1,18 ) = 16.71, <i>P</i> < 0.001        | Sex: F (1,18 ) = 19.57, <i>P</i> < 0.001         |                   |            |             |                   |
|                                   | Speed: F (7,126) = 532.67, <i>P</i> < 0.001     | Speed: F (7,126) = 700.52, <i>P</i> < 0.001      |                   |            |             |                   |
|                                   | Interaction: F (7,126) = 6.64, <i>P</i> < 0.001 | Interaction: F (7,126) = 8.40, <i>P</i> < 0.001  |                   |            |             |                   |
| $\dot{V}_E$                       | Sex: F (1,18 ) = 4.06, <i>P</i> = 0.059         | Sex: F (1,18 ) = 6.59, <i>P</i> = 0.019          |                   |            |             |                   |
|                                   | Speed: F (7,126) = 297.86, <i>P</i> < 0.001     | Speed: F (7,126) = 352.39, <i>P</i> < 0.001      |                   |            |             |                   |
|                                   | Interaction: F (7,126) = 1.42, <i>P</i> = 0.202 | Interaction: F (7,126) = 0.524, <i>P</i> = 0.815 |                   |            |             |                   |
| HR                                | Sex: F (1,18 ) = 1.08, <i>P</i> = 0.313         | Sex: F (1,18 ) = 1.21, <i>P</i> = 0.286          |                   |            |             |                   |
|                                   | Speed: F (7,126) = 271.72, <i>P</i> < 0.001     | Speed: F (7,126) = 578.43, <i>P</i> < 0.001      |                   |            |             |                   |
|                                   | Interaction: F (7,126) = 2.29, <i>P</i> = 0.032 | Interaction: F (7,126) = 5.00, <i>P</i> < 0.001  |                   |            |             |                   |

Values are mean ± standard deviation (SD). bpm; beats per minute. A two way repeated measures analysis of variance (ANOVA) was performed for a comparison between men and women within normoxia or hypoxia, respectively. \* *P* < 0.05 between men and women in normoxia. † *P* < 0.05 between men and women in hypoxia.

**Supplemental Table 2.** Breathing frequency (*Bf*) and tidal volume (TV) at rest and each gait speed under normoxia and hypoxia in men and women.

|                            | Normoxia                                        |              | Hypoxia                                         |              |
|----------------------------|-------------------------------------------------|--------------|-------------------------------------------------|--------------|
|                            | Men                                             | Women        | Men                                             | Women        |
| <i>Bf</i> (frequency)      |                                                 |              |                                                 |              |
| Rest                       | 11.2 ± 3.4                                      | 8.7 ± 1.9    | 12.1 ± 3.6                                      | 10.2 ± 3.0   |
| 0.67m s <sup>-1</sup>      | 19.2 ± 4.8                                      | 20.2 ± 2.3   | 18.6 ± 3.7                                      | 18.4 ± 3.4   |
| 0.83 m s <sup>-1</sup>     | 19.1 ± 6.8                                      | 21.4 ± 3.9   | 19.3 ± 4.6                                      | 21.0 ± 3.1   |
| 1.00 m s <sup>-1</sup>     | 19.6 ± 4.6                                      | 23.1 ± 4.2   | 23.5 ± 5.7                                      | 24.7 ± 4.6   |
| 1.17 m s <sup>-1</sup>     | 20.1 ± 5.4                                      | 25.6 ± 4.1*  | 24.9 ± 4.3                                      | 28.5 ± 4.6   |
| 1.33 m s <sup>-1</sup>     | 22.7 ± 5.5                                      | 27.6 ± 5.1   | 26.3 ± 3.8                                      | 32.8 ± 4.8†  |
| 1.50 m s <sup>-1</sup>     | 23.7 ± 6.1                                      | 31.9 ± 5.5*  | 30.4 ± 4.6                                      | 35.4 ± 4.5†  |
| 1.67 m s <sup>-1</sup>     | 26.8 ± 4.7                                      | 32.4 ± 4.7*  | 33.5 ± 5.0                                      | 38.1 ± 4.2†  |
| TV (L min <sup>-1</sup> )  |                                                 |              |                                                 |              |
| Rest                       | 1.05 ± 0.31                                     | 1.11 ± 0.28  | 1.17 ± 0.30                                     | 1.11 ± 0.38† |
| 0.67m s <sup>-1</sup>      | 1.05 ± 0.19                                     | 0.84 ± 0.10* | 1.25 ± 0.34                                     | 1.06 ± 0.23† |
| 0.83 m s <sup>-1</sup>     | 1.16 ± 0.22                                     | 0.87 ± 0.13* | 1.37 ± 0.28                                     | 1.06 ± 0.26† |
| 1.00 m s <sup>-1</sup>     | 1.32 ± 0.27                                     | 0.91 ± 0.10* | 1.30 ± 0.31                                     | 1.00 ± 0.27† |
| 1.17 m s <sup>-1</sup>     | 1.41 ± 0.33                                     | 0.92 ± 0.15* | 1.39 ± 0.28                                     | 1.03 ± 0.17† |
| 1.33 m s <sup>-1</sup>     | 1.43 ± 0.31                                     | 0.96 ± 0.19* | 1.51 ± 0.30                                     | 1.05 ± 0.14† |
| 1.50 m s <sup>-1</sup>     | 1.54 ± 0.32                                     | 1.00 ± 0.19* | 1.47 ± 0.30                                     | 1.15 ± 0.18† |
| 1.67 m s <sup>-1</sup>     | 1.52 ± 0.25                                     | 1.18 ± 0.21* | 1.67 ± 0.33                                     | 1.32 ± 0.19† |
| Results of a two-way ANOVA |                                                 |              |                                                 |              |
|                            | Normoxia                                        |              | Hypoxia                                         |              |
| <i>Bf</i>                  | Sex: F (1,18 ) = 4.19, <i>P</i> = 0.056         |              | Sex: F (1,18 ) = 3.46, <i>P</i> = 0.079         |              |
|                            | Speed: F (7,126) = 87.59, <i>P</i> < 0.001      |              | Speed: F (7,126) = 132.47, <i>P</i> < 0.001     |              |
|                            | Interaction: F (7,126) = 6.60, <i>P</i> < 0.001 |              | Interaction: F (7,126) = 4.14, <i>P</i> < 0.002 |              |
| TV                         | Sex: F (1,18 ) = 19.44, <i>P</i> < 0.001        |              | Sex: F (1,18 ) = 11.84, <i>P</i> = 0.003        |              |
|                            | Speed: F (7,126) = 11.71, <i>P</i> < 0.001      |              | Speed: F (7,126) = 6.25, <i>P</i> < 0.001       |              |
|                            | Interaction: F (7,126) = 6.04, <i>P</i> < 0.001 |              | Interaction: F (7,126) = 1.51, <i>P</i> = 0.168 |              |

Values are mean ± SD. A two way repeated measures analysis of variance (ANOVA) was performed for a comparison between men and women within normoxia or hypoxia, respectively. \* *P* < 0.05 between men and women in normoxia. † *P* < 0.05 between men and women in hypoxia.
